# Supplementary material
Source: Springer Nature journal article supplement (https://www.springermedizin.de/resource/supplementary/12880_2013_214_MOESM5_ESM.pdf/9450316)

No smoothing, threshold at  $bg_{\text{thresh}} = -9.6$

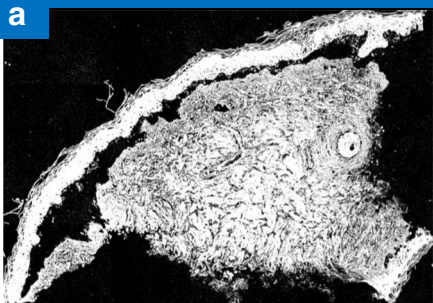

9x9 smoothing, threshold at  $bg_{\text{thresh}} = -9.6$

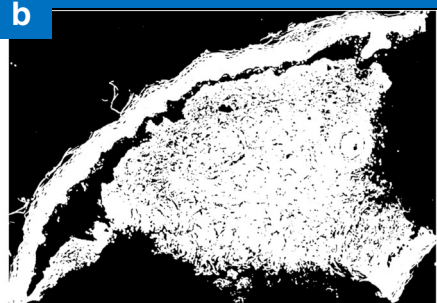

29x29 smoothing, threshold at  $bg_{\text{thresh}} = -9.6$

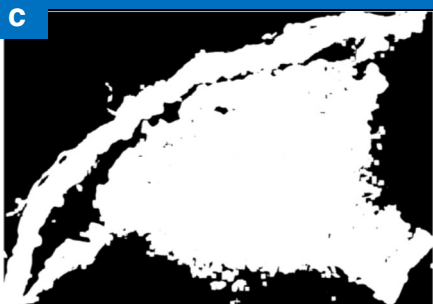

49x49 smoothing, threshold at  $bg_{\text{thresh}} = -9.6$

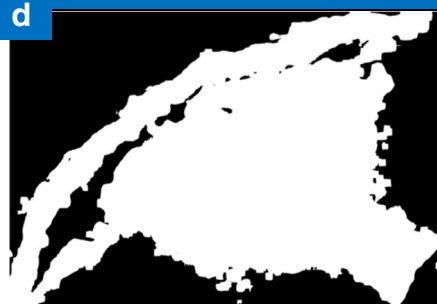

RGB Image, no smoothing

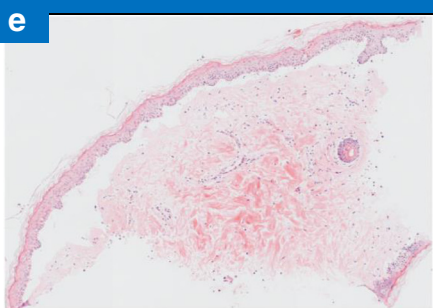

RGB Image, 29x29 smoothing

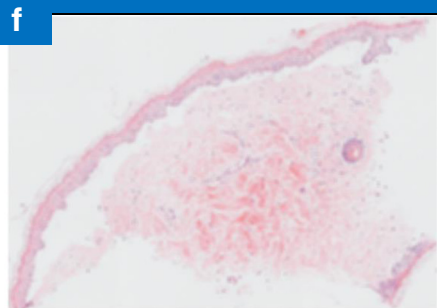

Supplement: MOESM5 [file 9450316]
